# Supplementary material
Source: PubMed Central journal article supplement (PMC298695)
Supplement: pnas_232735599_1.pdf [file pnas_232735599_1.pdf]

**Table 1. Calculated and measured masses of the peptides selected by the IMAC procedure**

| Peptide            | Residues | Sequence                         | Calculated mass, Da | Measured mass, Da*   | Measured mass, Da <sup>†</sup> |
|--------------------|----------|----------------------------------|---------------------|----------------------|--------------------------------|
| T <sub>31-32</sub> | 353–363  | SOHSSIGDLKR                      | 1227.6              | 1387.1               | 1227.4                         |
| T <sub>3-5</sub>   | 14–22    | RKNETSNSSPR                      | 1275.6              | 1355.1               | 1275.4                         |
| T <sub>24</sub>    | 255–269  | SGSFSSQLGNFFFSK                  | 1639.8              | 1719.2/1799.4        | 1639.4                         |
| T <sub>13</sub>    | 123–147  | FGSLINDQGTAGLSSHGGSF AAQNR       | 2492.2              | 2572.3/2652.3/2732.1 | 2491.9                         |
| T <sub>12-13</sub> | 121–147  | DRFGSLINDQGTAGLSSHGGSF AAQNR     | 2762.3              | 2843.6/2923.4/3003.7 | 2762.8                         |
| T <sub>11</sub>    | 95–120   | NQFSSSFLNANFAHTASFYGTSAQSR       | 2840.3              | 2921.4/3001.4/3080.8 | 2839.8                         |
| T <sub>30</sub>    | 324–352  | QPTGSYTDNFYGSPPSVHDHLPSSQSVPR    | 3157.5              | 3238.7/3318.4/3398.5 | 3156.9                         |
| T <sub>10</sub>    | 63–94    | ANVPVPGSVTTVTQIYSEEDSSSTAGSSLDDR | 3269.5              |                      | 3268.9                         |

The peptide masses are given as monoisotopic values.

\*The masses of phosphopeptides selected with the IMAC-beads before treatment with calf intestinal alkaline phosphatase were measured in the linear mode to avoid metastable decomposition of the phosphopeptides.

†Peptides after treatment with alkaline phosphatase were measured in reflector mode. Peptide numbering starts at the N-terminal methionine of NPR1.
